# Supplementary material for: Stacking interactions in stabilizing supramolecular assembly of M[9C]2M complexes: dynamic stability with remarkable nonlinear optical features
Source: Royal Society of Chemistry journal article supplement (doi:10.1039/d4cp04052j), 2024-11-25
Supplement: d4cp04052j1.pdf [file d4cp04052j1.pdf]

**Supplementary information for;**  
**Stacking interactions in stabilizing supramolecular assembly of**  
**M[9C]<sub>2</sub>M complexes: Dynamic stability with remarkable nonlinear**  
**optical features.**

Atazaz Ahsin,<sup>1,3\*</sup> Aamna Qamar,<sup>2,3</sup> Sadegh Kaviani,<sup>4</sup> V. Vetrivelan<sup>5</sup>

<sup>1</sup>Beijing National Laboratory for Molecular Sciences, Institute of Chemistry, Chinese  
Academy of Sciences, Beijing 100190, China,

<sup>2</sup>Beijing National Laboratory for Molecular Sciences, State Key Laboratory of Polymer  
Physics and Chemistry, Chinese Academy of Sciences, Beijing 100190, China

<sup>3</sup>School of Chemical Sciences, University of Chinese Academy of Sciences, Beijing  
100049, China

<sup>4</sup>Department of Physics, Kazan Federal University, Kazan, Russia

<sup>5</sup>Department of Physics, Government College of Engineering, Srirangam, Tiruchirappalli  
-620012, Tamilnadu, India.

Corresponding:\* (ahsin@iccas.ac.cn)

## **Table of content**

|                  |               |
|------------------|---------------|
| <b>Figure S1</b> | <b>S3</b>     |
| <b>Figure S2</b> | <b>S3</b>     |
| <b>Figure S3</b> | <b>S4</b>     |
| <b>Figure S4</b> | <b>S4</b>     |
| <b>Figure S5</b> | <b>S5</b>     |
| <b>Figure S6</b> | <b>S5</b>     |
| <b>Figure S7</b> | <b>S6</b>     |
| <b>Figure S8</b> | <b>S7</b>     |
| <b>Table S1</b>  | <b>S7</b>     |
| <b>Table S2</b>  | <b>S8</b>     |
| <b>Table S3</b>  | <b>S9-11</b>  |
| <b>Table S4</b>  | <b>S12</b>    |
| <b>Table S5</b>  | <b>S13-15</b> |
| <b>Table S6</b>  | <b>S15</b>    |

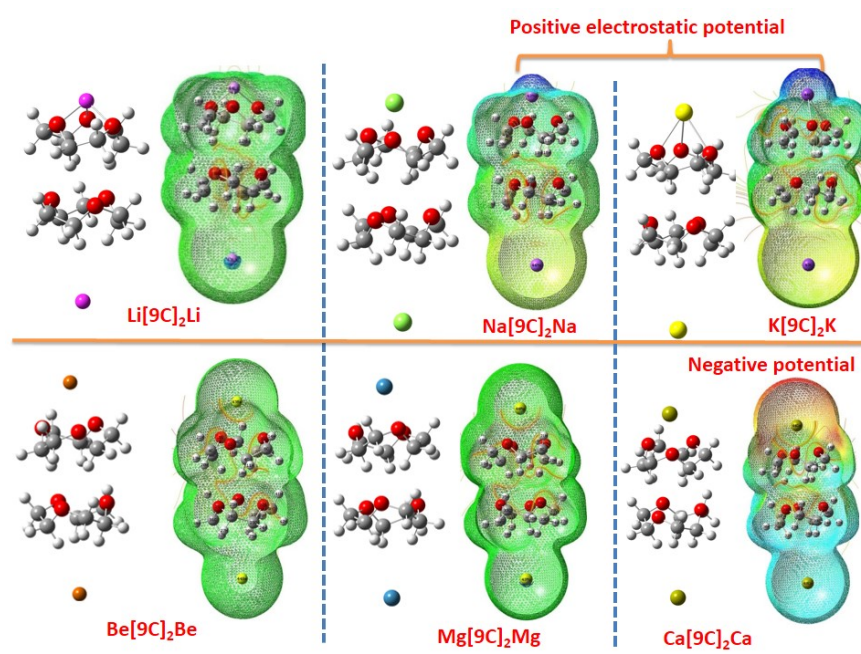

Figure S1: Optimized molecular geometries of [9C], dimer [9C]<sub>2</sub>, and their 2M[9C]<sub>2</sub>M (M=Li, Na, K, Be, Mg, and Ca) complexes along with their molecular electrostatic potential maps at the m062x/def2qzvpp level.

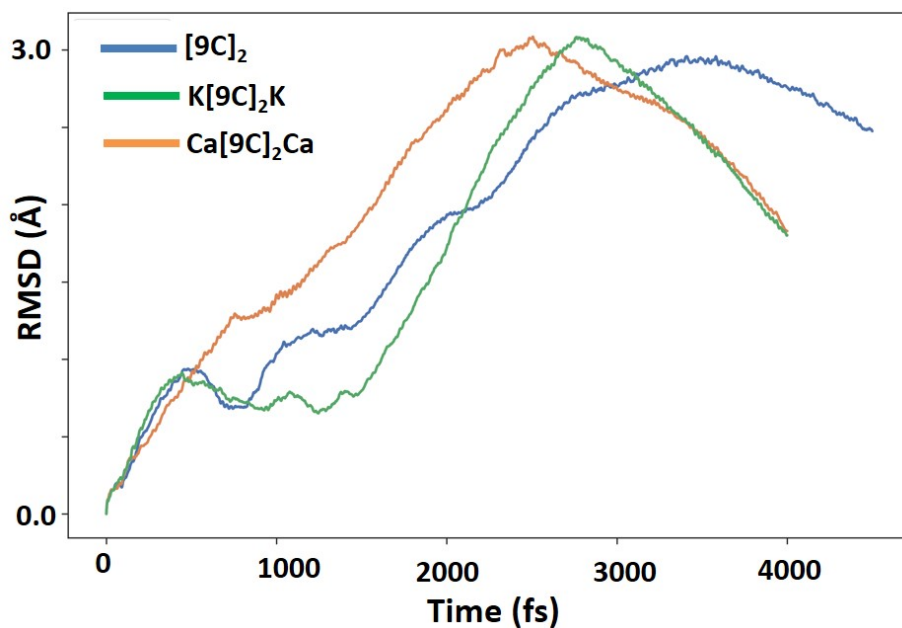

Figure S2: The plotted RMSD curve of  $[9C]_2$ , and  $M[9C]_2M$  (where  $M=K$  and  $Ca$ ) complexes.

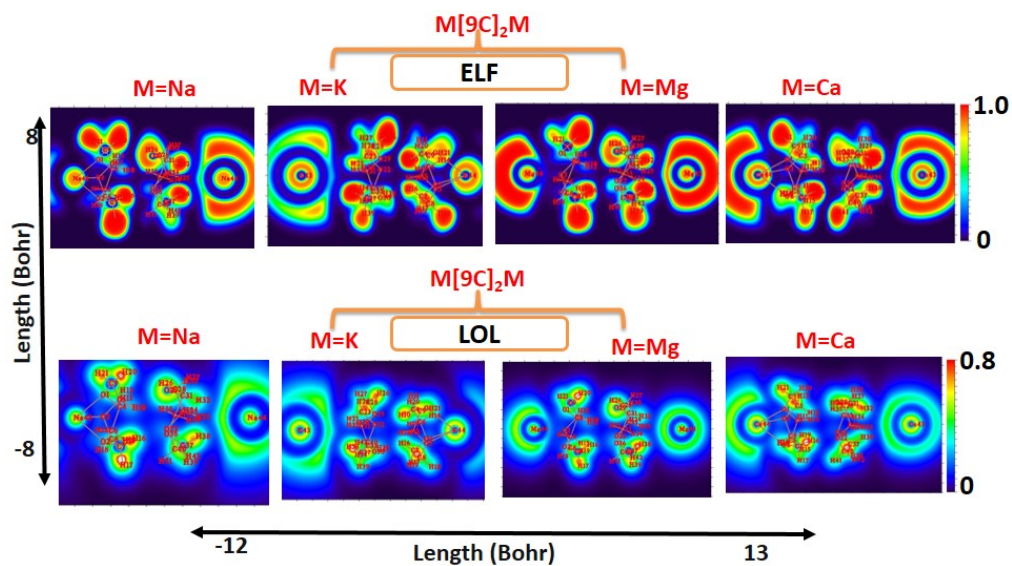

Figure S3: Electron localization function (upper panel) and localized orbital locator (lower panel) of  $M[9C]_2M$  complexes at the  $m062X/def2tqzvpp$  level.

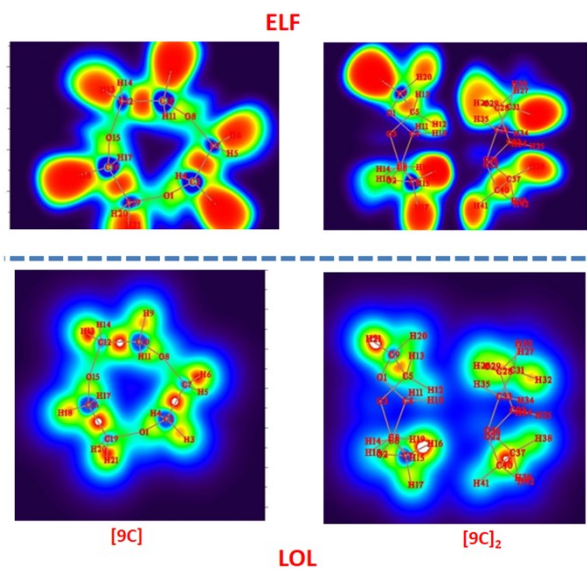

Figure S4: The ELF (upper panel) and LOL pictures (lower panel) of pure [9C] and its dimer [9C]<sub>2</sub>

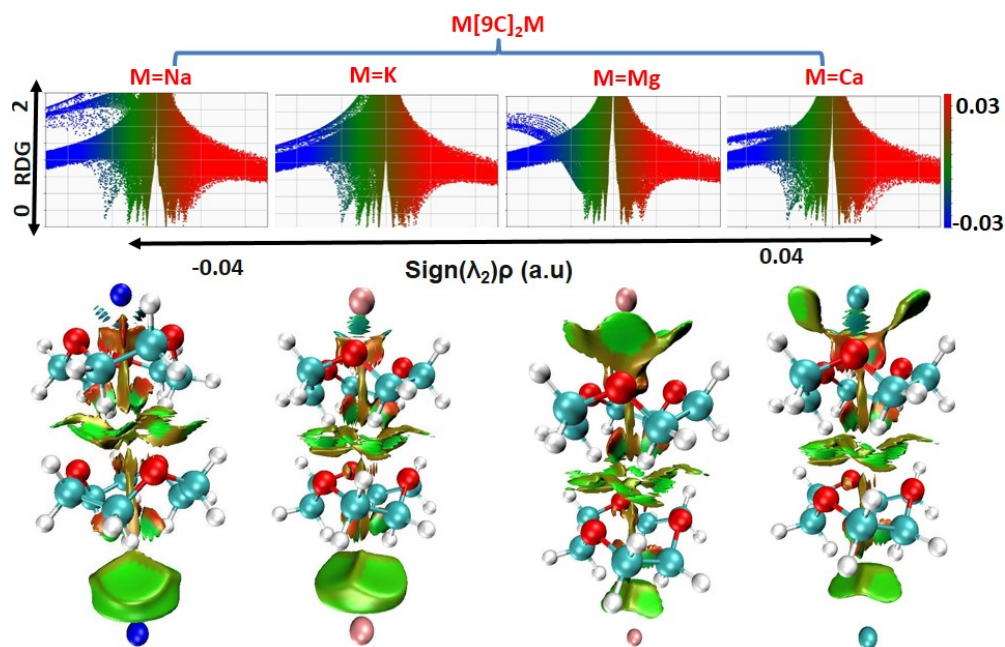

Figure S5: The molecular isosurface from noncovalent interaction analysis and radiant density gradient (RDG) 2D spectra of [9C]<sub>2</sub> and M[9C]<sub>2</sub>M (M=Li and Be) complexes at the m062X/def2qzvpp level.

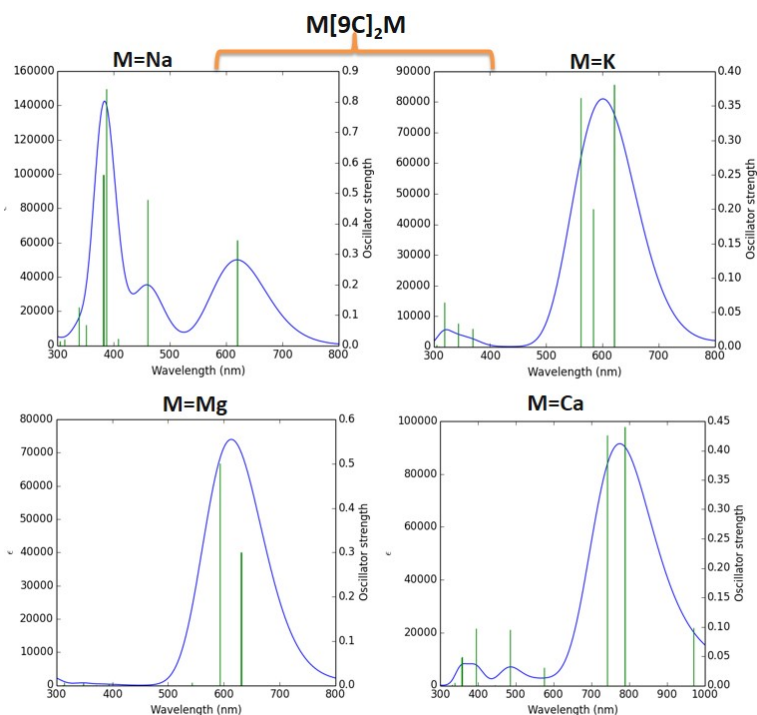

Figure S6: The obtained UV-visible spectra of M[9C]<sub>2</sub>M (where M= Na, K, Mg, and Ca) complexes at the m062X/def2qzvpp level.

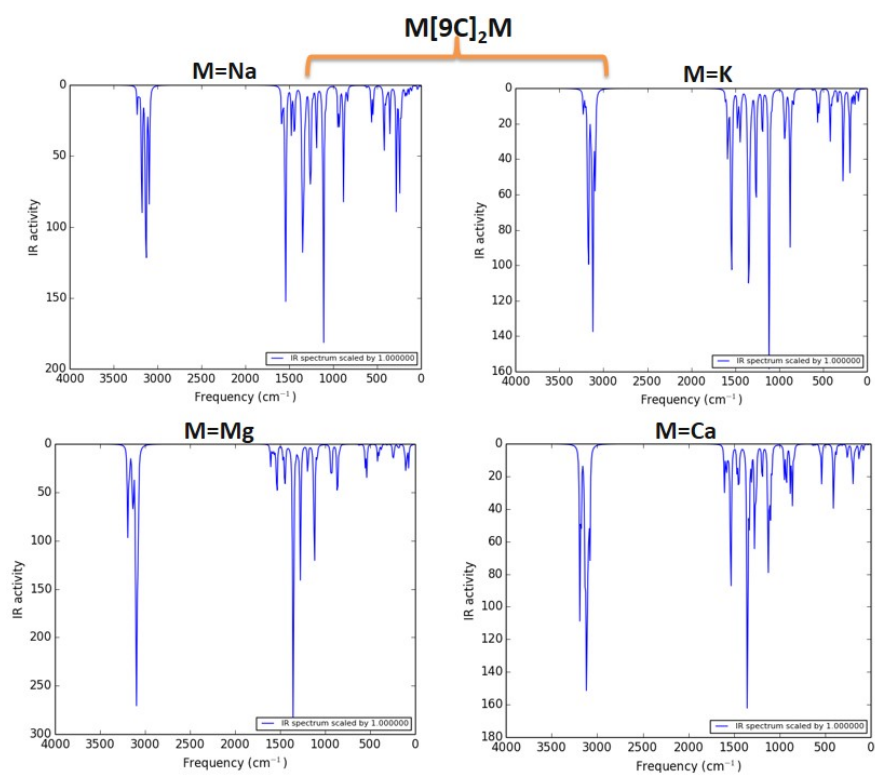

Figure S7: The obtained FT-IR spectra of M[9C]<sub>2</sub>M (where M= Na, K, Mg, and Ca) complexes at the m062X/def2qzvpp level.

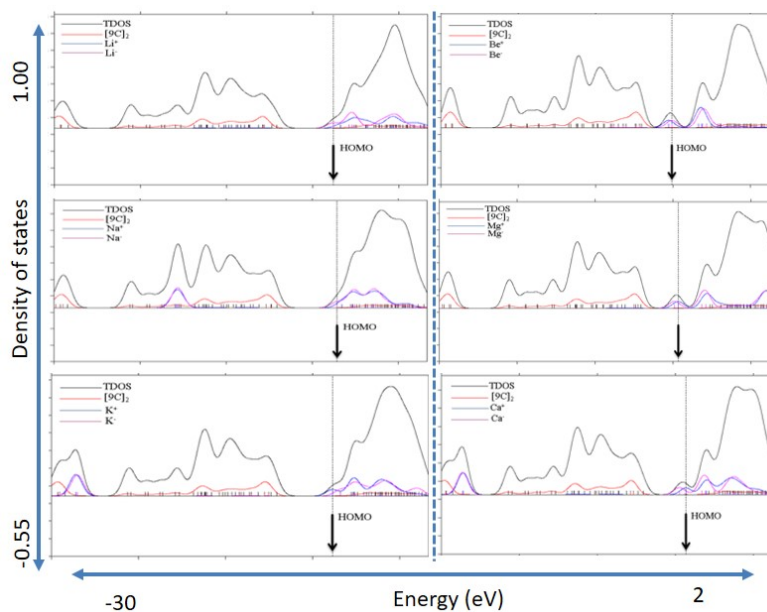

Fig. S8: Partial density of states (PDOS) spectra for  $M[9C]_2M$  complexes (upper series for alkali complexes) and lower panel for alkaline earth metal-based complexes.

Table S1: The geometric parameters, interaction energies ( $\Delta E$ ), and thermodynamic parameters of  $M[9C]_2M$  complexes were calculated at different levels.

| Complex                | Level           | $d_{AM-O}$<br>(Å) | $d_{AM-H}$<br>(Å) | $d_{AM-AM}$<br>(Å) | $\Delta E$<br>(kcal/mol) | $\Delta H$<br>(kcal/mol) | $\Delta G$<br>(kcal/mol) | $\Delta S$<br>(kcal/mol K) |
|------------------------|-----------------|-------------------|-------------------|--------------------|--------------------------|--------------------------|--------------------------|----------------------------|
| Li[9C] <sub>2</sub> Li | <b>B3LYP-D3</b> | 1.93              | 3.15              | 9.81               | -47.62                   | -48.31                   | -30.74                   | -0.058                     |
|                        | <b>MN-15</b>    | 1.94              | 2.88              | 9.57               | -55.84                   | -57.60                   | -39.72                   | -0.060                     |
|                        | <b>WB97XD</b>   | 1.92              | 3.19              | 9.81               | -43.48                   | -44.61                   | -27.10                   | -0.058                     |
| Na[9C] <sub>2</sub> Na | <b>B3LYP-D3</b> | 2.77              | 3.66              | 11.53              | -27.42                   | -25.53                   | -11.29                   | -0.047                     |
|                        | <b>MN-15</b>    | 2.65              | 3.68              | 11.38              | -26.04                   | -27.17                   | -11.48                   | -0.052                     |
|                        | <b>WB97XD</b>   | 2.62              | 3.95              | 11.57              | -12.70                   | -19.31                   | -2.69                    | -0.055                     |
| K[9C] <sub>2</sub> K   | <b>B3LYP-D3</b> | 2.67              | 2.97              | 10.77              | -17.19                   | -15.93                   | -3.20                    | -0.042                     |
|                        | <b>MN-15</b>    | 2.56              | 3.38              | 11.07              | -15.06                   | -16.25                   | -3.45                    | -0.043                     |
|                        | <b>WB97XD</b>   | 2.55              | 3.47              | 11.17              | -12.36                   | -13.49                   | -2.39                    | -0.037                     |

|                        |                 |      |      |       |        |        |        |        |
|------------------------|-----------------|------|------|-------|--------|--------|--------|--------|
| Be[9C] <sub>2</sub> Be | <b>B3LYP-D3</b> | 2.31 | 3.15 | 10.54 | -30.68 | -31.81 | -15.12 | -0.056 |
|                        | <b>MN-15</b>    | 2.29 | 3.20 | 10.37 | -31.18 | -32.31 | -18.69 | -0.045 |
|                        | <b>WB97XD</b>   | 2.25 | 3.38 | 10.47 | -27.35 | -28.61 | -11.48 | -0.057 |
| Mg[9C] <sub>2</sub> Mg | <b>B3LYP-D3</b> | 2.76 | 2.77 | 11.17 | -22.08 | -20.83 | -2.60  | -0.061 |
|                        | <b>MN-15</b>    | 2.54 | 3.00 | 11.68 | -19.70 | -21.02 | -8.03  | -0.043 |
|                        | <b>WB97XD</b>   | 2.64 | 3.14 | 12.04 | -18.69 | -17.82 | -7.71  | -0.033 |
| Ca[9C] <sub>2</sub> Ca | <b>B3LYP-D3</b> | 2.67 | 3.27 | 10.63 | -13.49 | -13.05 | -1.19  | -0.039 |
|                        | <b>MN-15</b>    | 2.68 | 3.80 | 10.64 | -11.79 | -15.43 | -1.44  | -0.046 |
|                        | <b>WB97XD</b>   | 2.65 | 4.17 | 10.89 | -7.21  | -8.47  | -1.82  | -0.022 |

Table S2: The performed charge decomposition analysis. The units are in |e|.

| <b>System</b>          | <b>Donation (d)</b> | <b>Back-donation (b)</b> | <b>Residual (d-b)</b> | <b>Repulsion (r)</b> |
|------------------------|---------------------|--------------------------|-----------------------|----------------------|
| Li[9C] <sub>2</sub> Li | 0.20                | -0.05                    | 0.25                  | 0.04                 |
| Na[9C] <sub>2</sub> Na | 0.11                | -0.02                    | 0.13                  | 0.06                 |
| K[9C] <sub>2</sub> K   | 0.06                | -0.02                    | 0.08                  | 0.007                |
| Be[9C] <sub>2</sub> Be | 0.09                | 0.03                     | 0.06                  | 0.11                 |
| Mg[9C] <sub>2</sub> Mg | 0.11                | 0.01                     | 0.10                  | -0.20                |
| Ca[9C] <sub>2</sub> Ca | 0.19                | 0.01                     | 0.18                  | -0.54                |

Table S3: Second order perturbation theory of fock matrix theory in NBO basis of isolated [9C]<sub>2</sub> and dual metal-doped [9C]<sub>2</sub> complexes.

| <b>System</b>     | <b>Donor(i)</b> | <b>Type</b> | <b>Acceptor(j)</b> | <b>Type</b> | <b>E(2)<sup>a</sup> (kJmol<sup>-1</sup>)</b> | <b>E(i)-E(j)<sup>b</sup> (a.u.)</b> | <b>F(i,j)<sup>c</sup> (a.u.)</b> |
|-------------------|-----------------|-------------|--------------------|-------------|----------------------------------------------|-------------------------------------|----------------------------------|
| [9C] <sub>2</sub> | 22O             | LP (1)      | C7 - H16           | σ*          | 0.25                                         | 1.11                                | 0.015                            |
|                   | 29O             | LP (1)      | C4 - H10           | σ*          | 0.19                                         | 0.85                                | 0.012                            |



|                                      |           |            |           |            |      |      |       |
|--------------------------------------|-----------|------------|-----------|------------|------|------|-------|
|                                      | 360       | LP (1)     | C5-H12    | $\sigma^*$ | 0.27 | 1.11 | 0.015 |
| <b>Li<sub>9</sub>C<sub>2</sub>Li</b> | O1        | LP (1)     | Li44      | RY(1)      | 1.76 | 1.15 | 0.042 |
|                                      | O1        | LP (1)     | Li43-Li44 | $\sigma^*$ | 5.03 | 0.71 | 0.054 |
|                                      | O2        | LP (1)     | Li44      | RY(1)      | 1.76 | 1.15 | 0.040 |
|                                      | O2        | LP (1)     | Li43-Li44 | $\sigma^*$ | 5.06 | 0.72 | 0.054 |
|                                      | O3        | LP (1)     | Li44      | RY(1)      | 1.76 | 1.15 | 0.040 |
|                                      | O3        | LP (1)     | Li43-Li44 | $\sigma^*$ | 5.06 | 0.72 | 0.054 |
|                                      | Li43-Li44 | $\sigma$   | C23-H25   | $\sigma^*$ | 2.43 | 0.50 | 0.032 |
|                                      | Li43-Li44 | $\sigma$   | C31-H32   | $\sigma^*$ | 2.43 | 0.50 | 0.032 |
|                                      | Li43-Li44 | $\sigma$   | C37-H38   | $\sigma^*$ | 2.46 | 0.50 | 0.032 |
| <b>Na<sub>9</sub>C<sub>2</sub>Na</b> | O1        | LP (1)     | Na43      | RY*(1)     | 0.28 | 1.75 | 0.02  |
|                                      | O1        | LP (1)     | Na43-Na44 | $\sigma$   | 2.99 | 0.67 | 0.04  |
|                                      | O2        | LP (1)     | Na43      | RY*(1)     | 0.29 | 1.75 | 0.02  |
|                                      | O2        | LP (1)     | Na43-Na44 | $\sigma$   | 2.99 | 0.67 | 0.04  |
|                                      | O3        | LP (1)     | Na43      | RY*(1)     | 0.29 | 1.75 | 0.02  |
|                                      | O3        | LP (1)     | Na43-Na44 | $\sigma$   | 2.99 | 0.67 | 0.04  |
|                                      | Na43-Na44 | $\sigma^*$ | C23-H25   | $\sigma^*$ | 1.83 | 0.5  | 0.027 |
|                                      | Na43-Na44 | $\sigma^*$ | C31-H32   | $\sigma^*$ | 1.83 | 0.5  | 0.027 |
|                                      | Na43-Na44 | $\sigma^*$ | C37-H38   | $\sigma^*$ | 1.82 | 0.5  | 0.027 |
| <b>K<sub>9</sub>C<sub>2</sub>K</b>   | O1        | LP (1)     | K44       | RY*(1)     | 0.53 | 1.5  | 0.025 |
|                                      | O1        | LP (1)     | K44-K43   | $\sigma$   | 1.53 | 0.66 | 0.028 |
|                                      | O2        | LP (1)     | K44       | RY*(1)     | 0.14 | 1.5  | 0.013 |
|                                      | O2        | LP (1)     | K44-K43   | $\sigma$   | 1.53 | 0.66 | 0.028 |
|                                      | O3        | LP (1)     | K44       | RY*(1)     | 0.13 | 1.5  | 0.012 |
|                                      | O3        | LP (1)     | K44-K43   | $\sigma$   | 1.53 | 0.66 | 0.028 |

|                             |         |            |         |            |      |      |       |
|-----------------------------|---------|------------|---------|------------|------|------|-------|
|                             | K44-K43 | $\sigma^*$ | C23-H25 | $\sigma^*$ | 1.25 | 0.49 | 0.022 |
|                             | K44-K43 | $\sigma^*$ | C31-H32 | $\sigma^*$ | 1.24 | 0.49 | 0.022 |
|                             | K44-K43 | $\sigma^*$ | C37-H38 | $\sigma^*$ | 1.25 | 0.49 | 0.023 |
| <b>Be[9C]<sub>2</sub>Be</b> | O1      | LP (1)     | Be43    | RY*(1)     | 0.05 | 1.51 | 0.008 |
|                             | O2      | LP (1)     | Be43    | RY*(1)     | 0.07 | 1.26 | 0.008 |
|                             | O3      | LP (1)     | Be43    | RY*(1)     | 0.13 | 1.24 | 0.012 |
|                             | Be44    | LP (1)     | C23-H25 | $\sigma^*$ | 0.91 | 0.68 | 0.022 |
|                             | Be44    | LP (1)     | C31-H32 | $\sigma^*$ | 0.92 | 0.68 | 0.022 |
|                             | Be44    | LP (1)     | C37-H38 | $\sigma^*$ | 0.93 | 0.68 | 0.023 |
| <b>Mg[9C]<sub>2</sub>Mg</b> | O1      | LP (2)     | Mg44    | RY*(1)     | 0.05 | 1.58 | 0.008 |
|                             | O2      | LP (2)     | Mg44    | RY*(1)     | 0.05 | 1.58 | 0.008 |
|                             | O3      | LP (2)     | Mg44    | RY*(1)     | 0.05 | 1.58 | 0.008 |
|                             | Mg43    | LP (1)     | C23-H25 | $\sigma^*$ | 0.8  | 0.64 | 0.02  |
|                             | Mg43    | LP (1)     | C31-H32 | $\sigma^*$ | 0.82 | 0.64 | 0.021 |
|                             | Mg43    | LP (1)     | C37-H38 | $\sigma^*$ | 0.83 | 0.64 | 0.021 |
| <b>Ca[9C]<sub>2</sub>Ca</b> | O1      | LP (1)     | Ca44    | RY*(1)     | 0.47 | 1.73 | 0.026 |
|                             | O2      | LP (1)     | Ca44    | RY*(1)     | 0.47 | 1.73 | 0.026 |
|                             | O3      | LP (1)     | Ca44    | RY*(1)     | 0.47 | 1.73 | 0.026 |
|                             | Ca43    | LP (1)     | C23-H25 | $\sigma^*$ | 0.69 | 0.59 | 0.018 |
|                             | Ca43    | LP (1)     | C31-H32 | $\sigma^*$ | 0.69 | 0.59 | 0.018 |
|                             | Ca43    | LP (1)     | C37-H38 | $\sigma^*$ | 0.69 | 0.59 | 0.018 |

$E_D$  means electron density.

<sup>a</sup>  $E(2)$  means energy of hyper conjugative interactions.

<sup>b</sup> Energy difference between donor and acceptor i and j NBO orbitals.

Table S4: Calculated polarizability ( $\alpha_o$  au) hyperpolarizability ( $\beta_o$  au), and total dipole moment ( $\mu_o$  D) using the various solvent in SDM model.

|          |            | 9C     | [9C]2  | Li(9C) <sub>2</sub> Li | Na(9C) <sub>2</sub> Na | K(9C) <sub>2</sub> K | Be(9C) <sub>2</sub> Be | Mg(9C) <sub>2</sub> Mg | Ca(9C) <sub>2</sub> Ca |
|----------|------------|--------|--------|------------------------|------------------------|----------------------|------------------------|------------------------|------------------------|
| DMSO     | $\alpha_o$ | 89.38  | 182.96 | 696.77                 | 954.90                 | 1242.47              | 375.41                 | 511.29                 | 1394.93                |
|          | $\beta_o$  | 361.96 | 697.04 | 396189.89              | 196888.13              | 332758.22            | 9972.95                | 6345.56                | 275200.15              |
|          | $\mu_o$    | 2.19   | 4.91   | 11.18                  | 13.68                  | 15.87                | 6.46                   | 7.22                   | 10.38                  |
| Acetone  | $\alpha_o$ | 241.54 | 180.84 | 639.76                 | 860.59                 | 1128.43              | 360.39                 | 488.94                 | 1271.87                |
|          | $\beta_o$  | 355.80 | 684.42 | 255050.77              | 355.79                 | 172577.83            | 7995.63                | 5339.43                | 355.79                 |
|          | $\mu_o$    | 2.18   | 4.89   | 11.15                  | 13.55                  | 15.70                | 6.43                   | 7.20                   | 10.24                  |
| Methanol | $\alpha_o$ | 89.54  | 183.17 | 695.19                 | 913.20                 | 1196.36              | 381.07                 | 508.44                 | 1248.70                |
|          | $\beta_o$  | 429.61 | 763.13 | 447675.76              | 195914.78              | 234053.69            | 6.71                   | 7034.79                | 213963.95              |
|          | $\mu_o$    | 2.48   | 5.33   | 10.96                  | 13.42                  | 15.56                | 9745.37                | 7.42                   | 10.65                  |
| n-hexane | $\alpha_o$ | 76.36  | 153.73 | 412.96                 | 476.04                 | 711.07               | 250.51                 | 332.74                 | 645.68                 |
|          | $\beta_o$  | 246.77 | 516.78 | 30653.14               | 33908.45               | 50387.44             | 1118.93                | 847.51                 | 21867.27               |
|          | $\mu_o$    | 1.83   | 4.35   | 10.21                  | 12.23                  | 14.09                | 5.78                   | 6.59                   | 9.06                   |
| water    | $\alpha_o$ | 90.27  | 184.89 | 746.44                 | 984.76                 | 1284.40              | 394.59                 | 526.02                 | 1311.61                |
|          | $\beta_o$  | 442.13 | 777.96 | 650587.02              | 211119.97              | 391328.07            | 11561.46               | 8220.09                | 257231.28              |
|          | $\mu_o$    | 2.52   | 5.38   | 10.97                  | 13.49                  | 15.68                | 6.74                   | 7.45                   | 10.76                  |

Table S5: QTAIM topological parameters for electron density  $\rho(r)$ , Laplacian of electron density  $\nabla^2\rho(r)$ , kinetic electron density  $G(r)$ , potential electron density  $V(r)$ , eigenvalues of Hessian matrix ( $\lambda$ ), and bond ellipticity index ( $\epsilon$ ) at the BCPs of the [9C], [9C]<sub>2</sub> and M[9C]<sub>2</sub>M (where M can be Li, K, Na, Be, Mg, and Ca).

| System                      | Bond     | $\rho(r)$ | $\nabla^2\rho(r)$ | $G(r)$ | $V(r)$  | $G(r)/ V(r) $ | $\lambda_1$ | $\lambda_2$ | $\lambda_3$ | $\epsilon$ | $E_{nt}$<br>(kJ/mol) |
|-----------------------------|----------|-----------|-------------------|--------|---------|---------------|-------------|-------------|-------------|------------|----------------------|
| <b>[9C]</b>                 | 1O-2C    | 0.2913    | - 1.199           | 0.043  | -0.386  | 0.111         | 0.452       | -0.843      | -0.808      | 0.0424     | -506.7               |
|                             | 1O-19C   | 0.265     | -0.575            | 0.249  | -0.643  | 0.387         | 0.450       | -0.510      | -0.515      | 0.0089     | -844.1               |
|                             | 8O-7C    | 0.265     | -0.575            | 0.249  | -0.643  | 0.387         | -0.510      | 0.450       | -0.515      | 0.0089     | -844.1               |
|                             | 8O-10C   | 0.268     | -0.611            | 0.244  | -0.641  | 0.381         | -0.533      | -0.518      | 0.440       | 0.0271     | -841.5               |
|                             | 15O-16C  | 0.268     | -0.611            | 0.244  | -0.642  | 0.380         | -0.518      | 0.441       | -0.533      | 0.0272     | -842.8               |
|                             | 15O-12C  | 0.265     | -0.575            | 0.249  | -0.643  | 0.387         | -0.510      | 0.450       | -0.515      | 0.0089     | -844.1               |
| <b>[9C]<sub>2</sub></b>     | 22O-16H  | 0.0066    | 0.024             | 0.0050 | -0.0039 | 1.282         | 0.0321      | -0.0028     | -0.0047     | 0.673      | -5.1                 |
|                             | 29O-12H  | 0.0065    | 0.0241            | 0.0049 | -0.0038 | 1.289         | 0.0314      | -0.0026     | -0.0046     | 0.729      | -5.0                 |
|                             | 36O-10H  | 0.0065    | 0.0242            | 0.0049 | -0.0038 | 1.289         | 0.0316      | -0.0046     | -0.0027     | 0.711      | -5.0                 |
| <b>Li[9C]<sub>2</sub>Li</b> | 22O-16H  | 0.0094    | 0.0357            | 0.0076 | -0.0062 | 1.226         | 0.0490      | -0.0056     | -0.0075     | 0.345      | -8.1                 |
|                             | 29O-12H  | 0.0134    | 0.0516            | 0.0111 | -0.0094 | 1.181         | 0.0774      | -0.0133     | -0.0123     | 0.080      | -12.3                |
|                             | 36O-10H  | 0.0093    | 0.0351            | 0.0074 | -0.0061 | 1.213         | 0.0479      | -0.0073     | -0.0054     | 0.366      | -8.0                 |
|                             | 1O-44Li  | 0.0346    | 0.243             | 0.0531 | -0.0454 | 1.170         | -0.0608     | -0.0637     | 0.367       | 0.0466     | -59.6                |
|                             | 2O-44Li  | 0.0346    | 0.243             | 0.0532 | -0.0454 | 1.172         | -0.0609     | 0.368       | -0.0638     | 0.0472     | -59.6                |
|                             | 3O-44Li  | 0.0340    | 0.238             | 0.0520 | -0.0443 | 1.174         | -0.0594     | 0.360       | -0.0621     | 0.0464     | -58.2                |
|                             | 25H-43Li | 0.293     | 1.222             | 0.0404 | -0.386  | 0.105         | 0.460       | -0.826      | -0.855      | 0.0355     | -506.7               |
|                             | 30H-43Li | 0.0051    | 0.0027            | 0.0008 | -0.0010 | 0.800         | 0.0049      | -0.0010     | -0.0012     | 0.259      | -1.3                 |
|                             | 32H-43Li | 0.0051    | 0.0026            | 0.0008 | -0.0010 | 0.800         | 0.0049      | -0.0012     | -0.0010     | 0.256      | -1.3                 |
| <b>Na[9C]<sub>2</sub>Na</b> | 22O-16H  | 0.0124    | 0.0472            | 0.0101 | -0.0084 | 1.202         | 0.0702      | -0.0118     | -0.011      | 0.0721     | -11.0                |
|                             | 29O-12H  | 0.0070    | 0.0307            | 0.0063 | -0.005  | 1.260         | 0.0218      | 0.0096      | -0.0007     | -1.081     | -6.6                 |
|                             | 36O-10H  | 0.0089    | 0.0334            | 0.007  | -0.0057 | 1.228         | 0.0455      | -0.0070     | -0.005      | 0.377      | -7.5                 |
|                             | 1O-44Na  | 0.0234    | 0.153             | 0.0323 | -0.0263 | 1.228         | 0.215       | -0.0321     | -0.0299     | 0.0735     | -34.5                |
|                             | 2O-44 Na | 0.0235    | 0.153             | 0.0324 | -0.0264 | 1.227         | 0.216       | -0.0300     | -0.0323     | 0.0736     | -34.7                |

|                             |           |        |        |        |         |       |        |         |         |        |        |
|-----------------------------|-----------|--------|--------|--------|---------|-------|--------|---------|---------|--------|--------|
|                             | 3O-44 Na  | 0.0234 | 0.153  | 0.0323 | -0.0263 | 1.228 | 0.215  | -0.0299 | -0.0322 | 0.0738 | -34.5  |
|                             | 25H-43 Na | 0.0043 | 0.002  | 0.0007 | -0.0009 | 0.778 | 0.0036 | -0.0006 | -0.0009 | 0.373  | -1.2   |
|                             | 30H-43 Na | 0.0043 | 0.002  | 0.0007 | -0.0009 | 0.778 | 0.0036 | -0.0006 | -0.0009 | 0.378  | -1.2   |
|                             | 32H-43 Na | 0.0043 | 0.002  | 0.0007 | -0.0009 | 0.778 | 0.0036 | -0.0006 | -0.0009 | 0.378  | -1.2   |
| <b>K[9C]<sub>2</sub>K</b>   | 22O-16H   | 0.012  | 0.045  | 0.0097 | -0.0081 | 1.198 | 0.0678 | -0.0106 | -0.0114 | 0.067  | -10.6  |
|                             | 29O-12H   | 0.260  | 0.562  | 0.242  | -0.624  | 0.388 | -0.503 | 0.491   | 0.432   | 0.0232 | -819.2 |
|                             | 36O-10H   | 0.0085 | 0.0321 | 0.0067 | -0.0055 | 1.218 | 0.0435 | -0.0066 | -0.0047 | 0.401  | -7.2   |
|                             | 1O-44K    | 0.020  | 0.097  | 0.020  | -0.017  | 1.176 | 0.138  | -0.021  | -0.020  | 0.079  | -22.3  |
|                             | 2O-44K    | 0.020  | 0.097  | 0.020  | -0.017  | 1.176 | 0.138  | -0.021  | -0.020  | 0.079  | -22.3  |
|                             | 3O-44K    | 0.020  | 0.097  | 0.020  | -0.017  | 1.176 | 0.138  | -0.021  | -0.020  | 0.079  | -22.3  |
|                             | 25H-43K   | 0.003  | 0.001  | 0.0004 | -0.0006 | 0.667 | 0.001  | -0.0003 | -0.0001 | 2.034  | -0.8   |
|                             | 30H-43K   | 0.003  | 0.001  | 0.0004 | -0.0006 | 0.667 | 0.001  | -0.0001 | -0.0003 | 1.796  | -0.8   |
|                             | 32H-43K   | 0.003  | 0.001  | 0.0004 | -0.0006 | 0.667 | 0.001  | -0.0003 | -0.0001 | 2.470  | -0.8   |
| <b>Be[9C]<sub>2</sub>Be</b> | 22O-16H   | 0.006  | 0.024  | 0.005  | -0.004  | 1.250 | 0.033  | -0.0029 | -0.0047 | 0.651  | -5.3   |
|                             | 29O-12H   | 0.009  | 0.034  | 0.007  | -0.005  | 1.400 | 0.049  | -0.007  | -0.0078 | 0.032  | -6.6   |
|                             | 36O-10H   | 0.006  | 0.024  | 0.005  | -0.004  | 1.250 | 0.032  | -0.0047 | -0.0028 | 0.663  | -5.3   |
|                             | 1O-44Be   | 0.009  | 0.016  | 0.004  | -0.004  | 1.000 | 0.028  | -0.0059 | -0.0055 | 0.074  | -5.3   |
|                             | 2O-44 Be  | 0.009  | 0.016  | 0.004  | -0.004  | 1.000 | 0.028  | -0.0059 | -0.0055 | 0.075  | -5.3   |
|                             | 3O-44 Be  | 0.009  | 0.016  | 0.004  | -0.004  | 1.000 | 0.028  | -0.0059 | -0.0055 | -0.005 | -5.3   |
|                             | 25H-43 Be | 0.004  | 0.008  | 0.002  | -0.001  | 2.000 | 0.012  | -0.0019 | -0.0023 | 0.192  | -1.3   |
|                             | 30H-43 Be | 0.290  | 1.190  | 0.0429 | -0.383  | 0.112 | 0.450  | -0.804  | -0.836  | 0.039  | -502.8 |
|                             | 32H-43 Be | 0.004  | 0.008  | 0.001  | -0.001  | 1.000 | 0.013  | -0.0024 | -0.002  | 0.182  | -1.3   |
| <b>Mg[9C]<sub>2</sub>Mg</b> | 22O-16H   | 0.261  | 0.561  | 0.244  | -0.629  | 0.388 | -0.502 | -0.497  | 0.438   | 0.010  | -825.7 |
|                             | 29O-12H   | 0.009  | 0.034  | 0.007  | -0.005  | 1.400 | 0.050  | -0.008  | -0.007  | 0.036  | -6.6   |
|                             | 36O-10H   | 0.297  | 1.247  | 0.042  | -0.396  | 0.106 | 0.460  | -0.838  | -0.869  | 0.035  | -519.8 |
|                             | 1O-44Mg   | 0.009  | 0.013  | 0.003  | -0.004  | 0.750 | 0.022  | -0.004  | -0.004  | 0.068  | -5.3   |
|                             | 2O-44 Mg  | 0.009  | 0.013  | 0.003  | -0.004  | 0.750 | 0.022  | -0.004  | -0.004  | 0.068  | -5.3   |
|                             | 3O-44 Mg  | 0.009  | 0.013  | 0.003  | -0.004  | 0.750 | 0.022  | -0.004  | -0.004  | 0.067  | -5.3   |
|                             | 25H-43 Mg | 0.004  | 0.005  | 0.001  | -0.001  | 1.000 | 0.008  | -0.001  | -0.001  | 0.221  | -1.3   |
|                             | 30H-43 Mg | 0.004  | 0.005  | 0.001  | -0.001  | 1.000 | 0.008  | -0.001  | -0.001  | 0.215  | -1.3   |

|                             |           |       |       |        |         |       |        |         |         |       |        |
|-----------------------------|-----------|-------|-------|--------|---------|-------|--------|---------|---------|-------|--------|
|                             | 32H-43 Mg | 0.004 | 0.005 | 0.001  | -0.001  | 1.000 | 0.008  | -0.001  | -0.001  | 0.235 | -1.3   |
| <b>Ca[9C]<sub>2</sub>Ca</b> | 22O-16H   | 0.007 | 0.026 | 0.005  | -0.004  | 1.250 | 0.034  | -0.005  | -0.003  | 0.641 | -5.3   |
|                             | 29O-12H   | 0.297 | 1.256 | 0.041  | -0.395  | 0.104 | 0.459  | -0.873  | -0.842  | 0.038 | -518.5 |
|                             | 36O-10H   | 0.007 | 0.026 | 0.005  | -0.004  | 1.250 | 0.035  | -0.003  | -0.005  | 0.609 | -5.3   |
|                             | 1O-44Ca   | 0.021 | 0.101 | 0.022  | -0.018  | 1.222 | 0.144  | -0.022  | -0.021  | 0.118 | -23.6  |
|                             | 2O-44 Ca  | 0.021 | 0.101 | 0.022  | -0.018  | 1.222 | 0.144  | -0.022  | -0.023  | 0.118 | -23.6  |
|                             | 3O-44 Ca  | 0.021 | 0.101 | 0.022  | -0.018  | 1.222 | 0.144  | -0.022  | -0.021  | 0.118 | -23.6  |
|                             | 25H-43 Ca | 0.003 | 0.003 | 0.0007 | -0.0007 | 1.000 | 0.004  | -0.0009 | -0.0007 | 0.308 | -0.9   |
|                             | 30H-43 Ca | 0.290 | 1.196 | 0.042  | -0.384  | 0.109 | 0.452  | -0.808  | -0.840  | 0.038 | -504.1 |
|                             | 32H-43 Ca | 0.262 | 0.564 | 0.246  | -0.634  | 0.388 | -0.506 | 0.442   | -0.500  | 0.012 | -832.3 |

Table S6: Vibrational stretching frequencies of isolated [9C]<sub>2</sub> and dual metal-doped [9C]<sub>2</sub> complexes.

| <b>Complex</b>         | <b><math>\nu_{C-O}</math></b> | <b><math>\nu_{C-H}</math></b> | <b><math>\nu_{M-O}</math></b> |
|------------------------|-------------------------------|-------------------------------|-------------------------------|
| [9C] <sub>2</sub>      | 1368.54                       | 3076.32                       | -                             |
| Li[9C] <sub>2</sub> Li | 1265.08                       | 3079.08                       | 525.16                        |
| Na[9C] <sub>2</sub> Na | 1107.45                       | 3127.26                       | 242.89                        |
| K[9C] <sub>2</sub> K   | 1120.71                       | 3124.33                       | 242.89                        |
| Be[9C] <sub>2</sub> Be | 1361.21                       | 3093.56                       | 135.15                        |
| Mg[9C] <sub>2</sub> Mg | 1348.41                       | 3104.45                       | 70.50                         |
| Ca[9C] <sub>2</sub> Ca | 1336.59                       | 3124.33                       | 192.59                        |
